# Supplementary material for: Carbon-negative hydrogen: aqueous phase reforming (APR) of glycerol over NiPt bimetallic catalyst coupled with CO2 sequestration
Source: Royal Society of Chemistry journal article supplement (doi:10.1039/d4gc01896f), 2024-01-01
Supplement: d4gc01896f1.pdf [file d4gc01896f1.pdf]

## Supplementary information

### Carbon-Negative Hydrogen: Aqueous Phase Reforming (APR) of Glycerol over NiPt Bimetallic Catalyst Coupled with CO<sub>2</sub> Sequestration

Leoncio Santiago-Martínez<sup>1,2</sup>, Mengting Li<sup>1</sup>, Paola Munoz-Briones<sup>1</sup>, Javiera Vergara-Zambrano<sup>1</sup>, Styliani Avraamidou<sup>1</sup>, James A. Dumesic<sup>1</sup>, and George W. Huber<sup>1\*</sup>

<sup>1</sup>Department of Chemical and Biological Engineering, University of Wisconsin, Madison, WI 53706, USA.

<sup>2</sup>DOE Center for Advanced Bioenergy and Bioproducts Innovation, University of Illinois at Urbana-Champaign, Urbana, IL, USA

\*Correspondence: gwhuber@wisc.edu

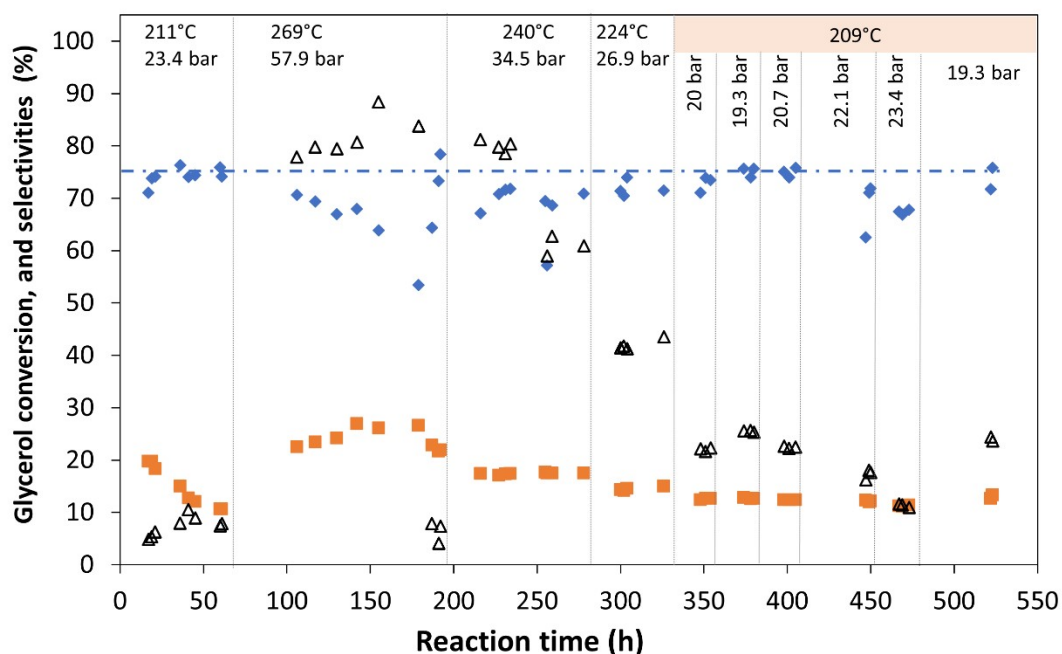

**Figure S1.** Glycerol conversion (Δ), hydrogen selectivity (⊕), and alkanes selectivity (⊕) in the aqueous phase reforming of 10 wt% of glycerol. Catalyst: Pt – 260. WHSV of 0.367 h<sup>-1</sup>. Total time on stream: 523 h.

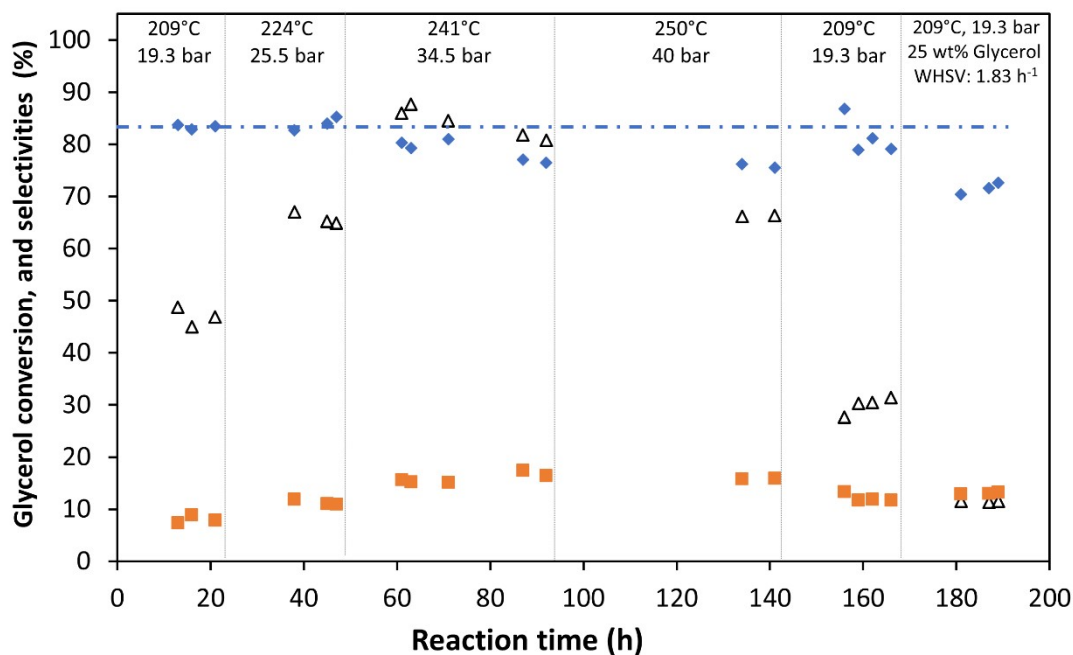

**Figure S2.** Glycerol conversion ( $\Delta$ ), hydrogen selectivity ( $\oplus$ ), and alkanes selectivity ( $\circ$ ) in the aqueous phase reforming of 10 wt% of glycerol. Catalyst:  $\text{Ni}_1\text{Pt}_1 - 260$ . WHSV of  $0.37 \text{ h}^{-1}$ . Total time on stream: 190 h.

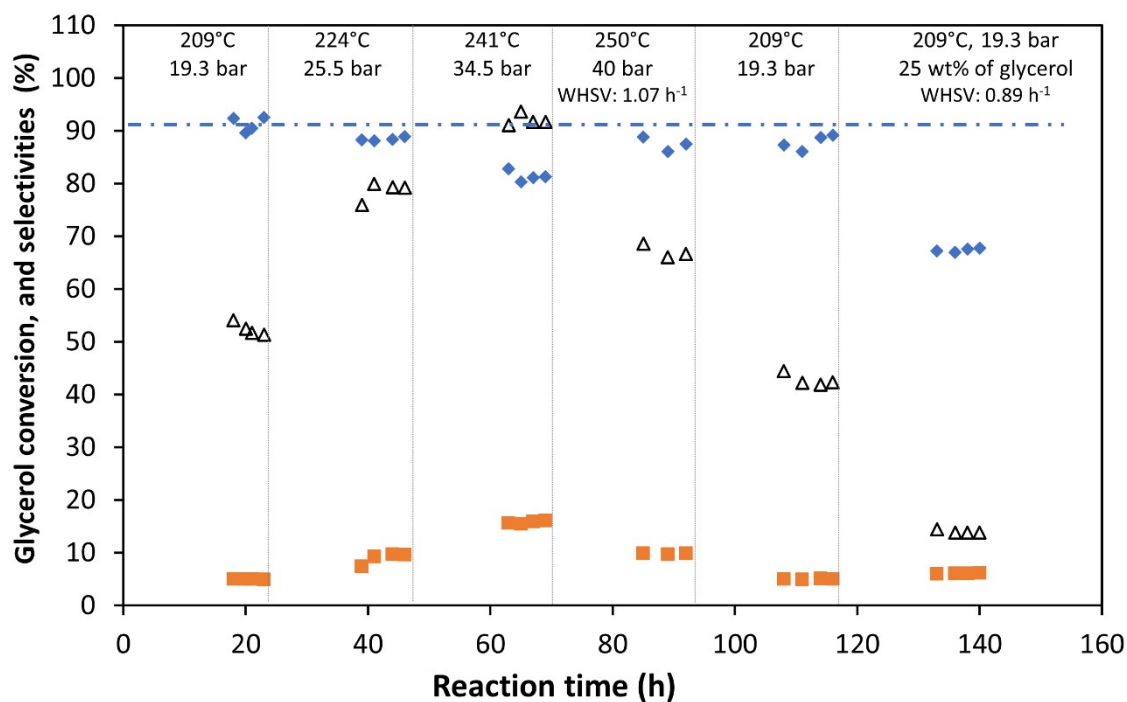

**Figure S3.** Glycerol conversion ( $\Delta$ ), hydrogen selectivity ( $\oplus$ ), and alkanes selectivity ( $\circ$ ) in the aqueous phase reforming of 10 wt% of glycerol. Catalyst:  $\text{Ni}_8\text{Pt}_1 - 260$ . WHSV of  $0.36 \text{ h}^{-1}$ . Total time on stream: 140 h.

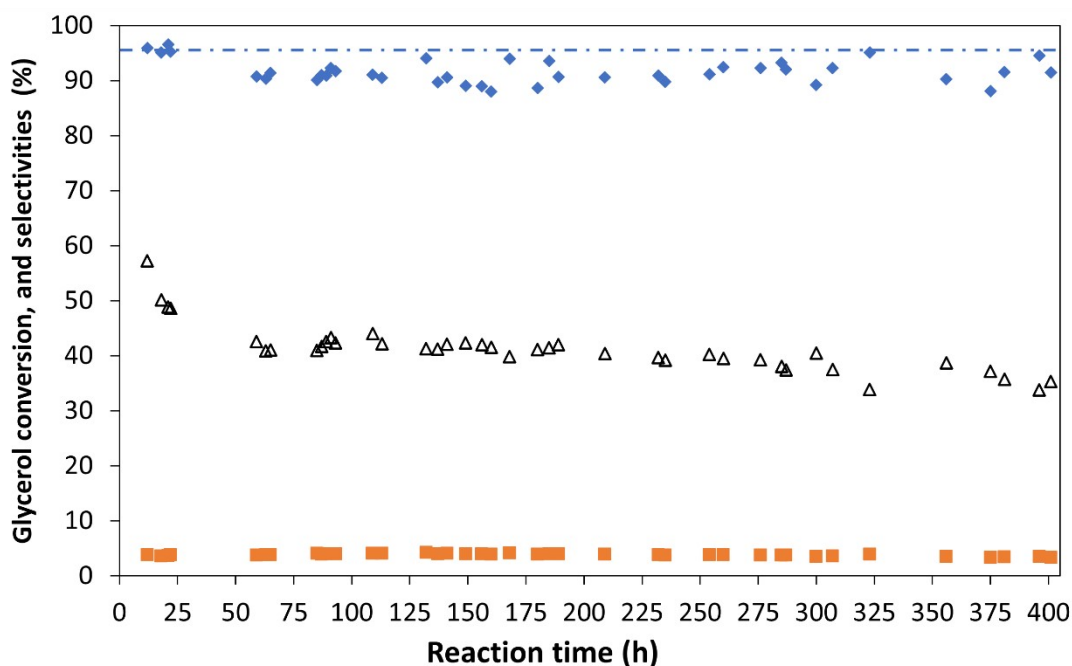

**Figure S4.** Glycerol conversion ( $\Delta$ ), hydrogen selectivity ( $\oplus$ ), and alkanes selectivity ( $\circ$ ) in the aqueous phase reforming of 10 wt% of glycerol. Catalyst:  $\text{Ni}_8\text{Pt}_1 - 450$ . WHSV of  $0.36 \text{ h}^{-1}$ . Total time on stream: 401 h. Reaction conditions:  $209^\circ\text{C}$ , and 19.3 bar.

#### APR Experiment for isothermal $\text{CO}_2$ adsorption at $600^\circ\text{C}$

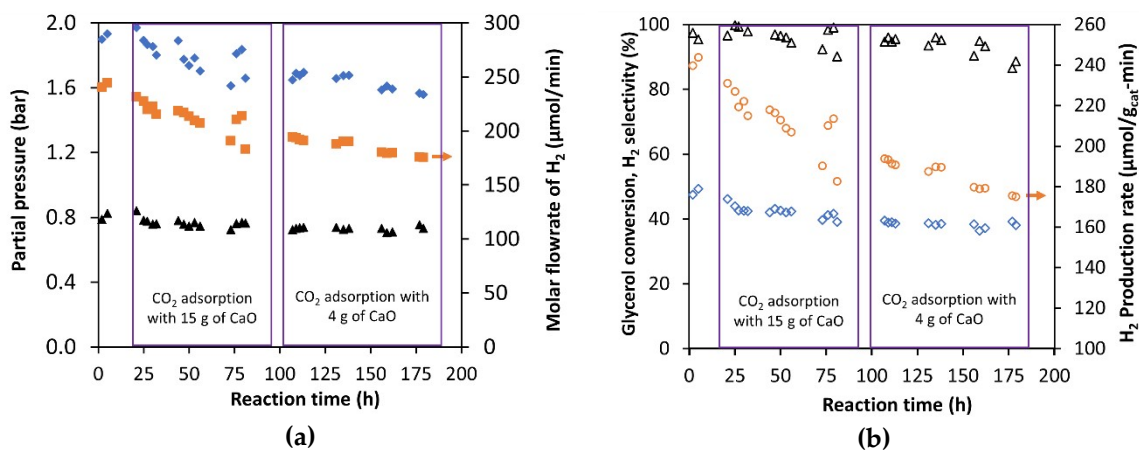

**Figure S5.** (a) Hydrogen ( $\oplus$ ), and  $\text{CO}_2$  ( $\blacktriangle$ ) partial pressure of the inlet stream to the  $\text{CO}_2$  bed at  $600^\circ\text{C}$ , from the APR of 10 wt% of glycerol ( $209^\circ\text{C}$  and 19.3 bar), and hydrogen molar flowrate ( $\circ$ ). (b) Glycerol conversion to the gas phase ( $\diamond$ ), hydrogen selectivity ( $\Delta$ ), and hydrogen production rate ( $\circ$ ) in the APR of 10 wt% of glycerol, used for the  $\text{CO}_2$  adsorption at  $600^\circ\text{C}$ . Catalyst:  $\text{Ni}_8\text{Pt}_1 - 450$ .

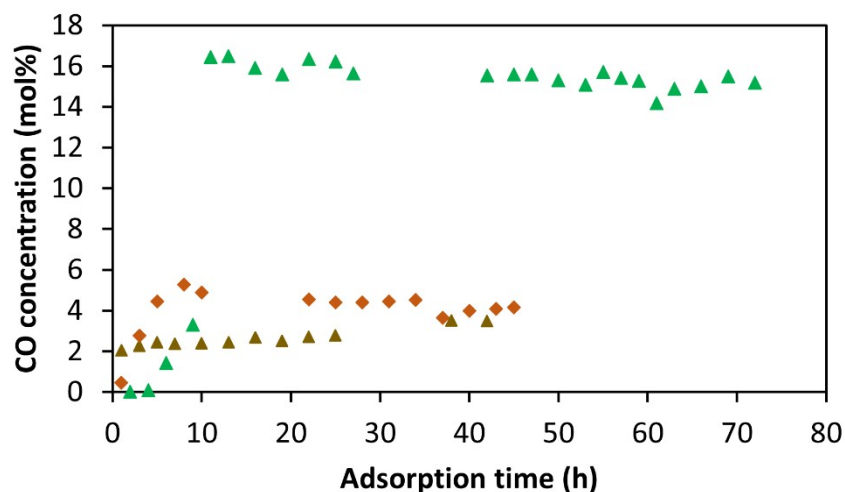

**Figure S6.** CO concentration in the outlet stream of the CO<sub>2</sub> adsorber at 600°C. CaO-packed bed with 4 g (▲) and 15 g (◆) at 0.75 bar of CO<sub>2</sub> partial pressure; inlet gas composition (mol%): 86.8% N<sub>2</sub>, 9.1% H<sub>2</sub>, 4% CO<sub>2</sub>, 0.12% CH<sub>4</sub>; and total molar gas inlet flow = 0.00223 mol/min. ▲ CaO-packed bed with 25 g at 5.3 bar of CO<sub>2</sub> partial pressure; inlet gas composition(mol%): 4.7% N<sub>2</sub>, 63.4% H<sub>2</sub>, 27.7% CO<sub>2</sub>, 1.3% CH<sub>4</sub>; and total gas molar inlet flow = 0.00081 mol/min.

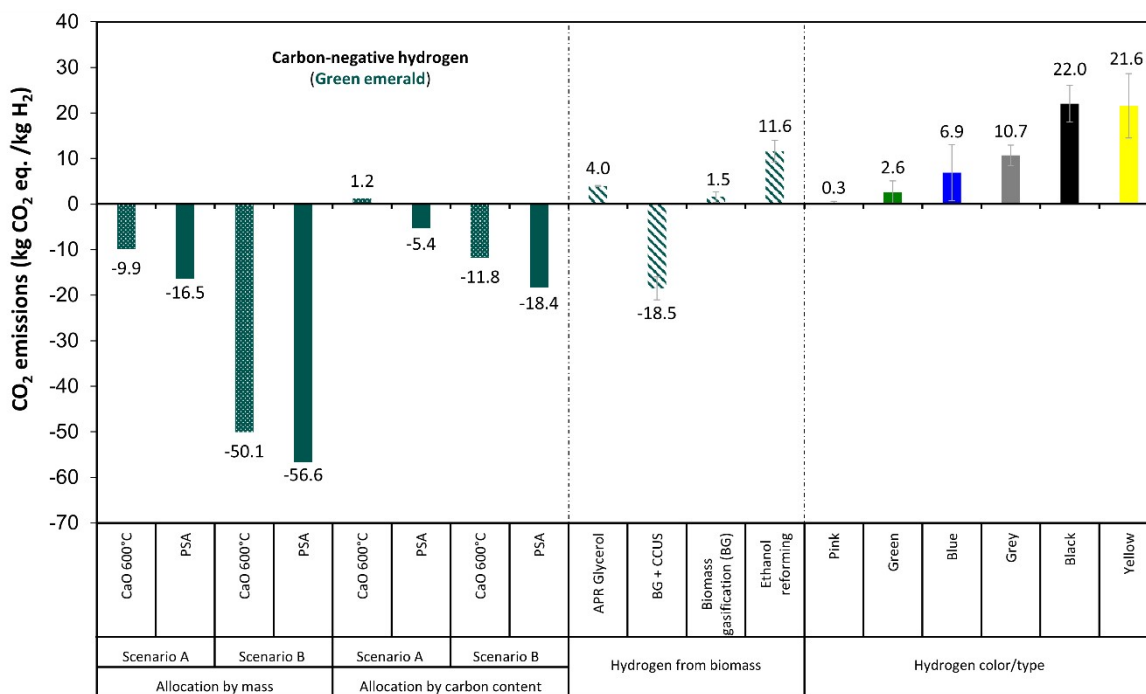

**Figure S7.** GHG emissions of all scenarios and the contributions of each production stage to the total GHG emissions considering PSA.

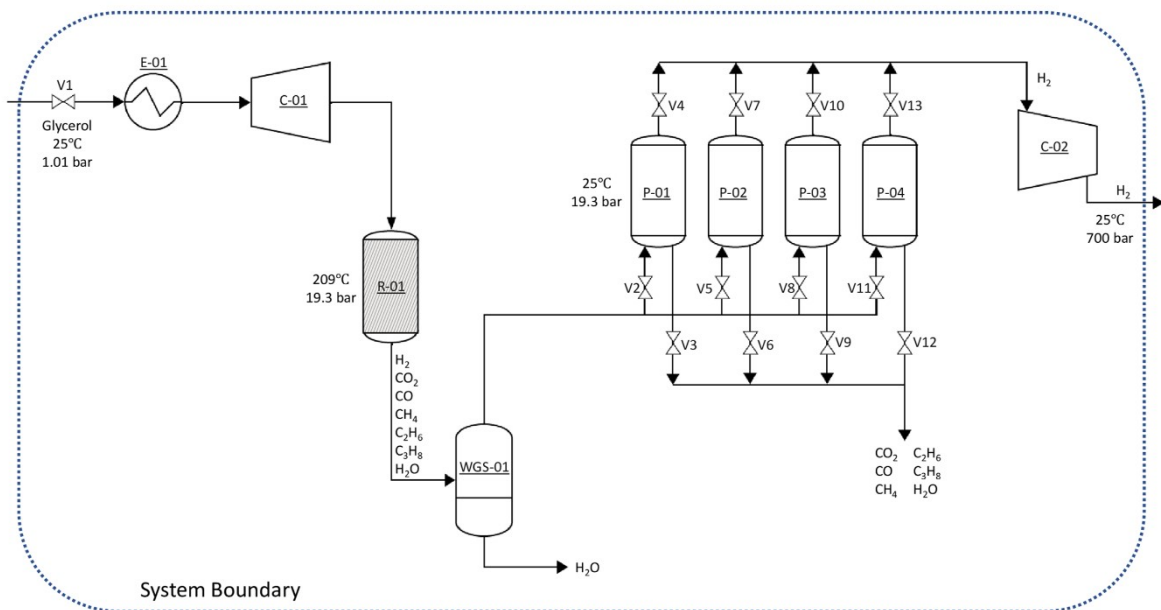

**Figure S8.** Process scheme of APR of glycerol to produce  $H_2$  analyzed considering PSA.
